# Supplementary material for: Effector loading onto the VgrG carrier activates type VI secretion system assembly
Source: PubMed Central journal article supplement (PMC6945064; doi:10.15252/embr.201947961), 2019-12-05

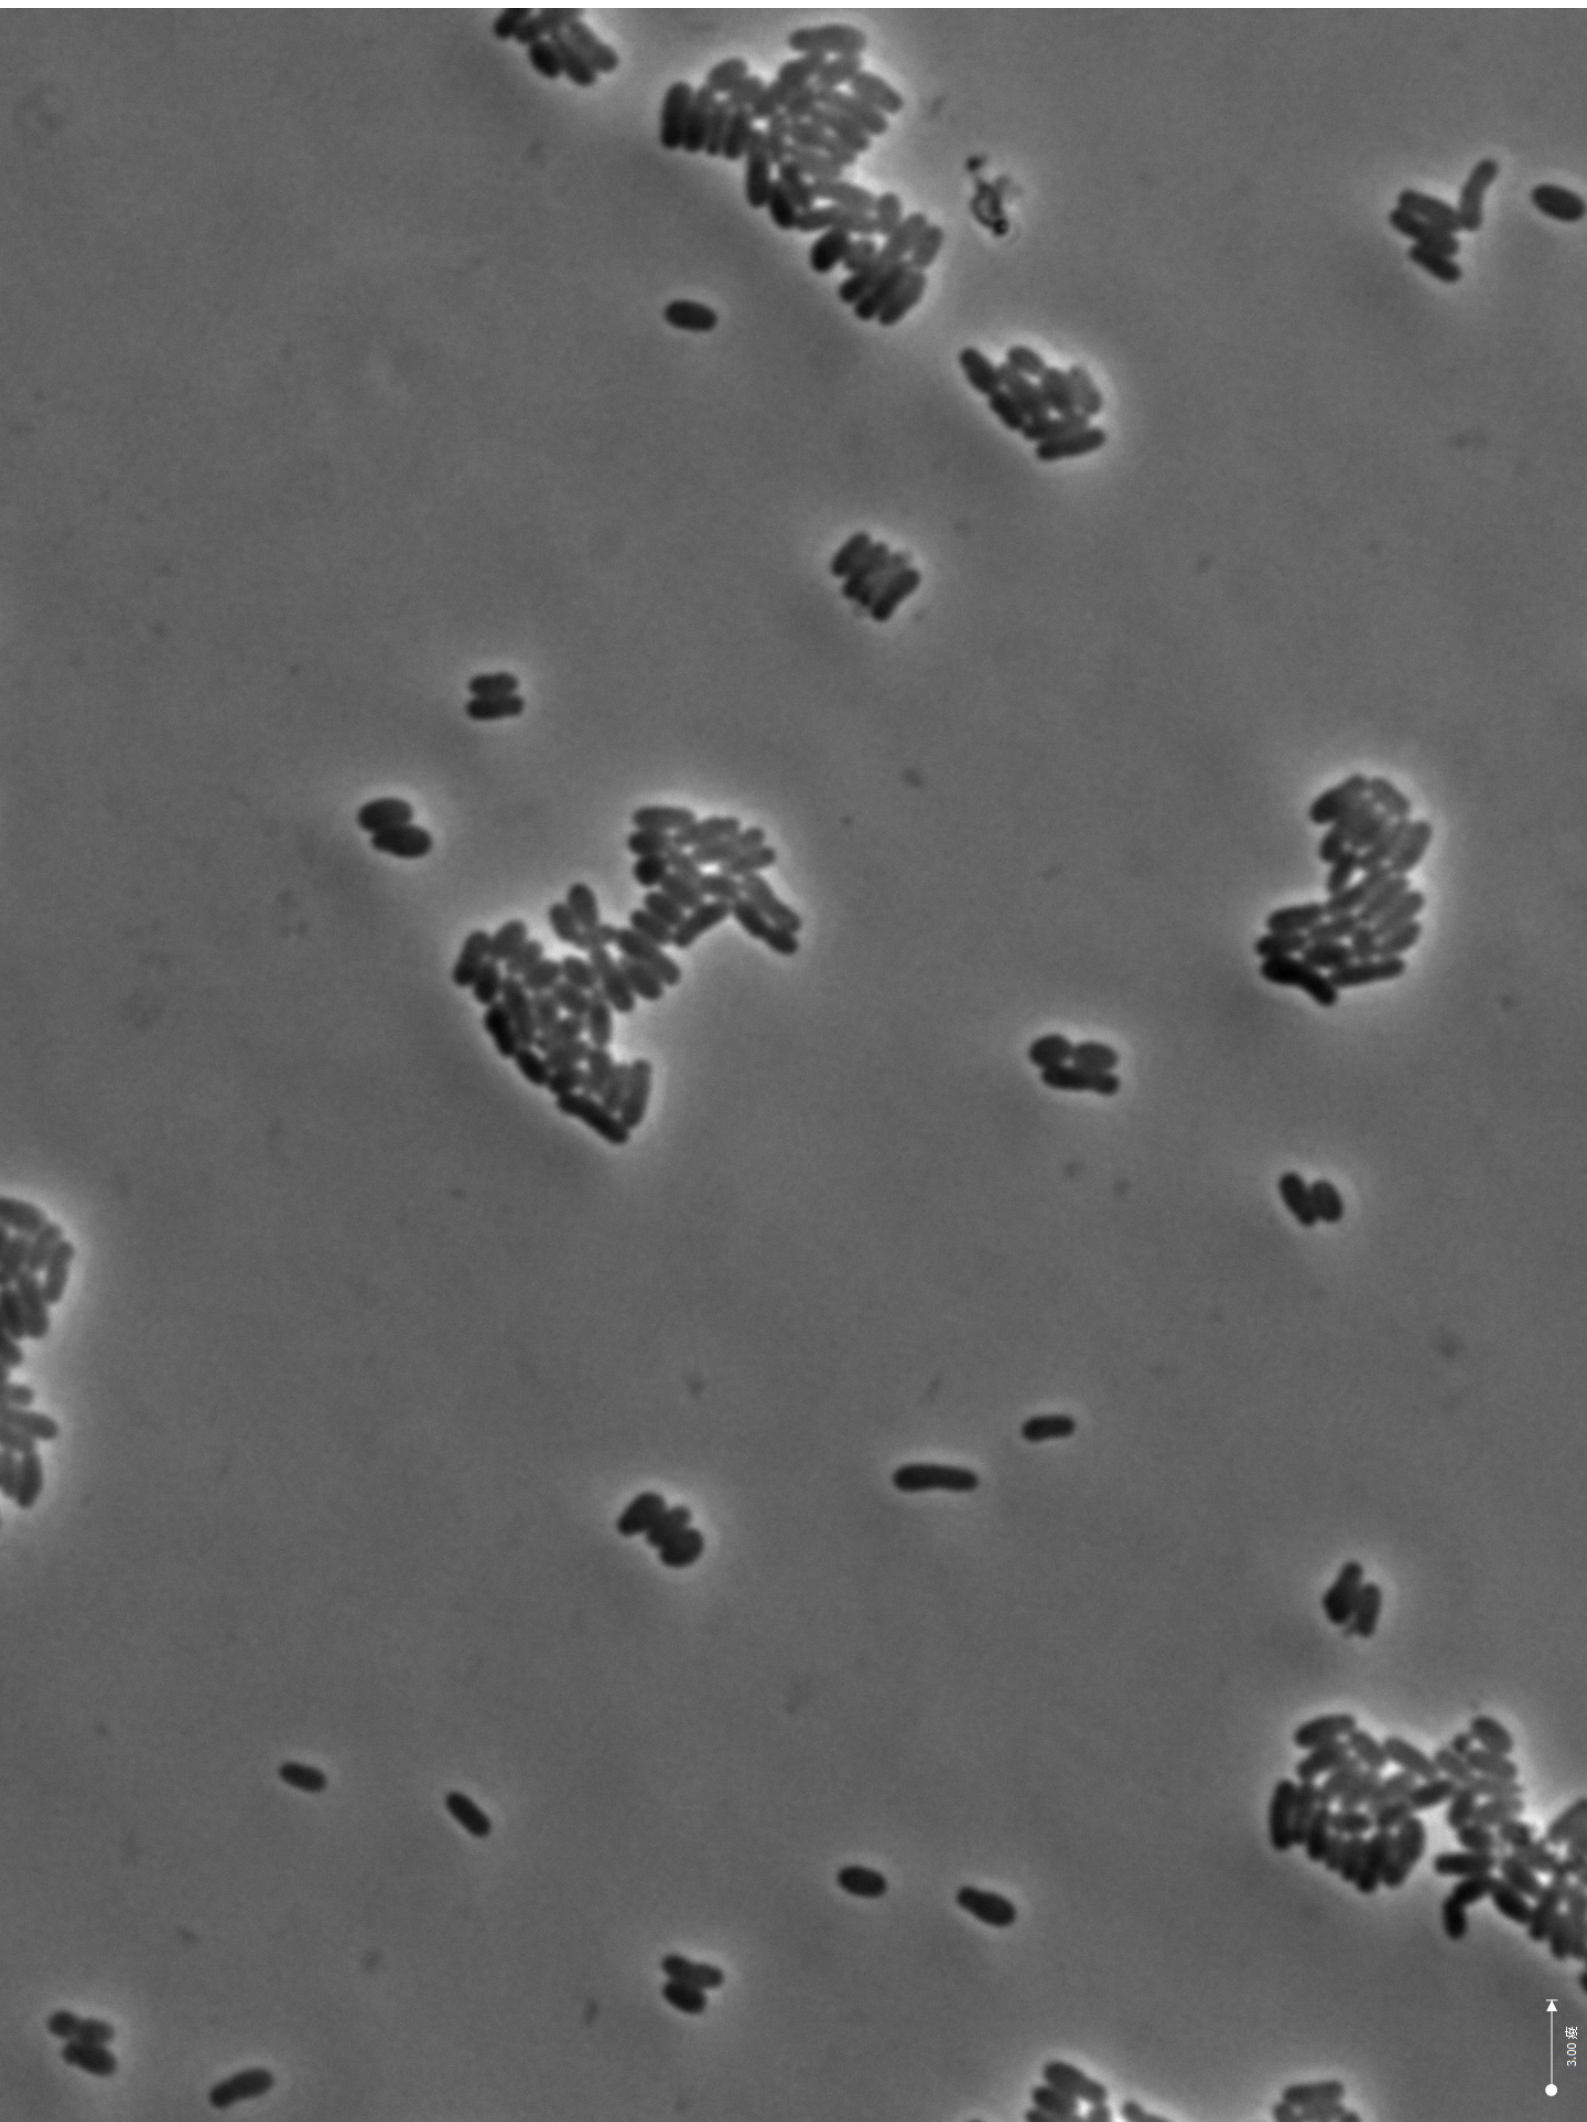

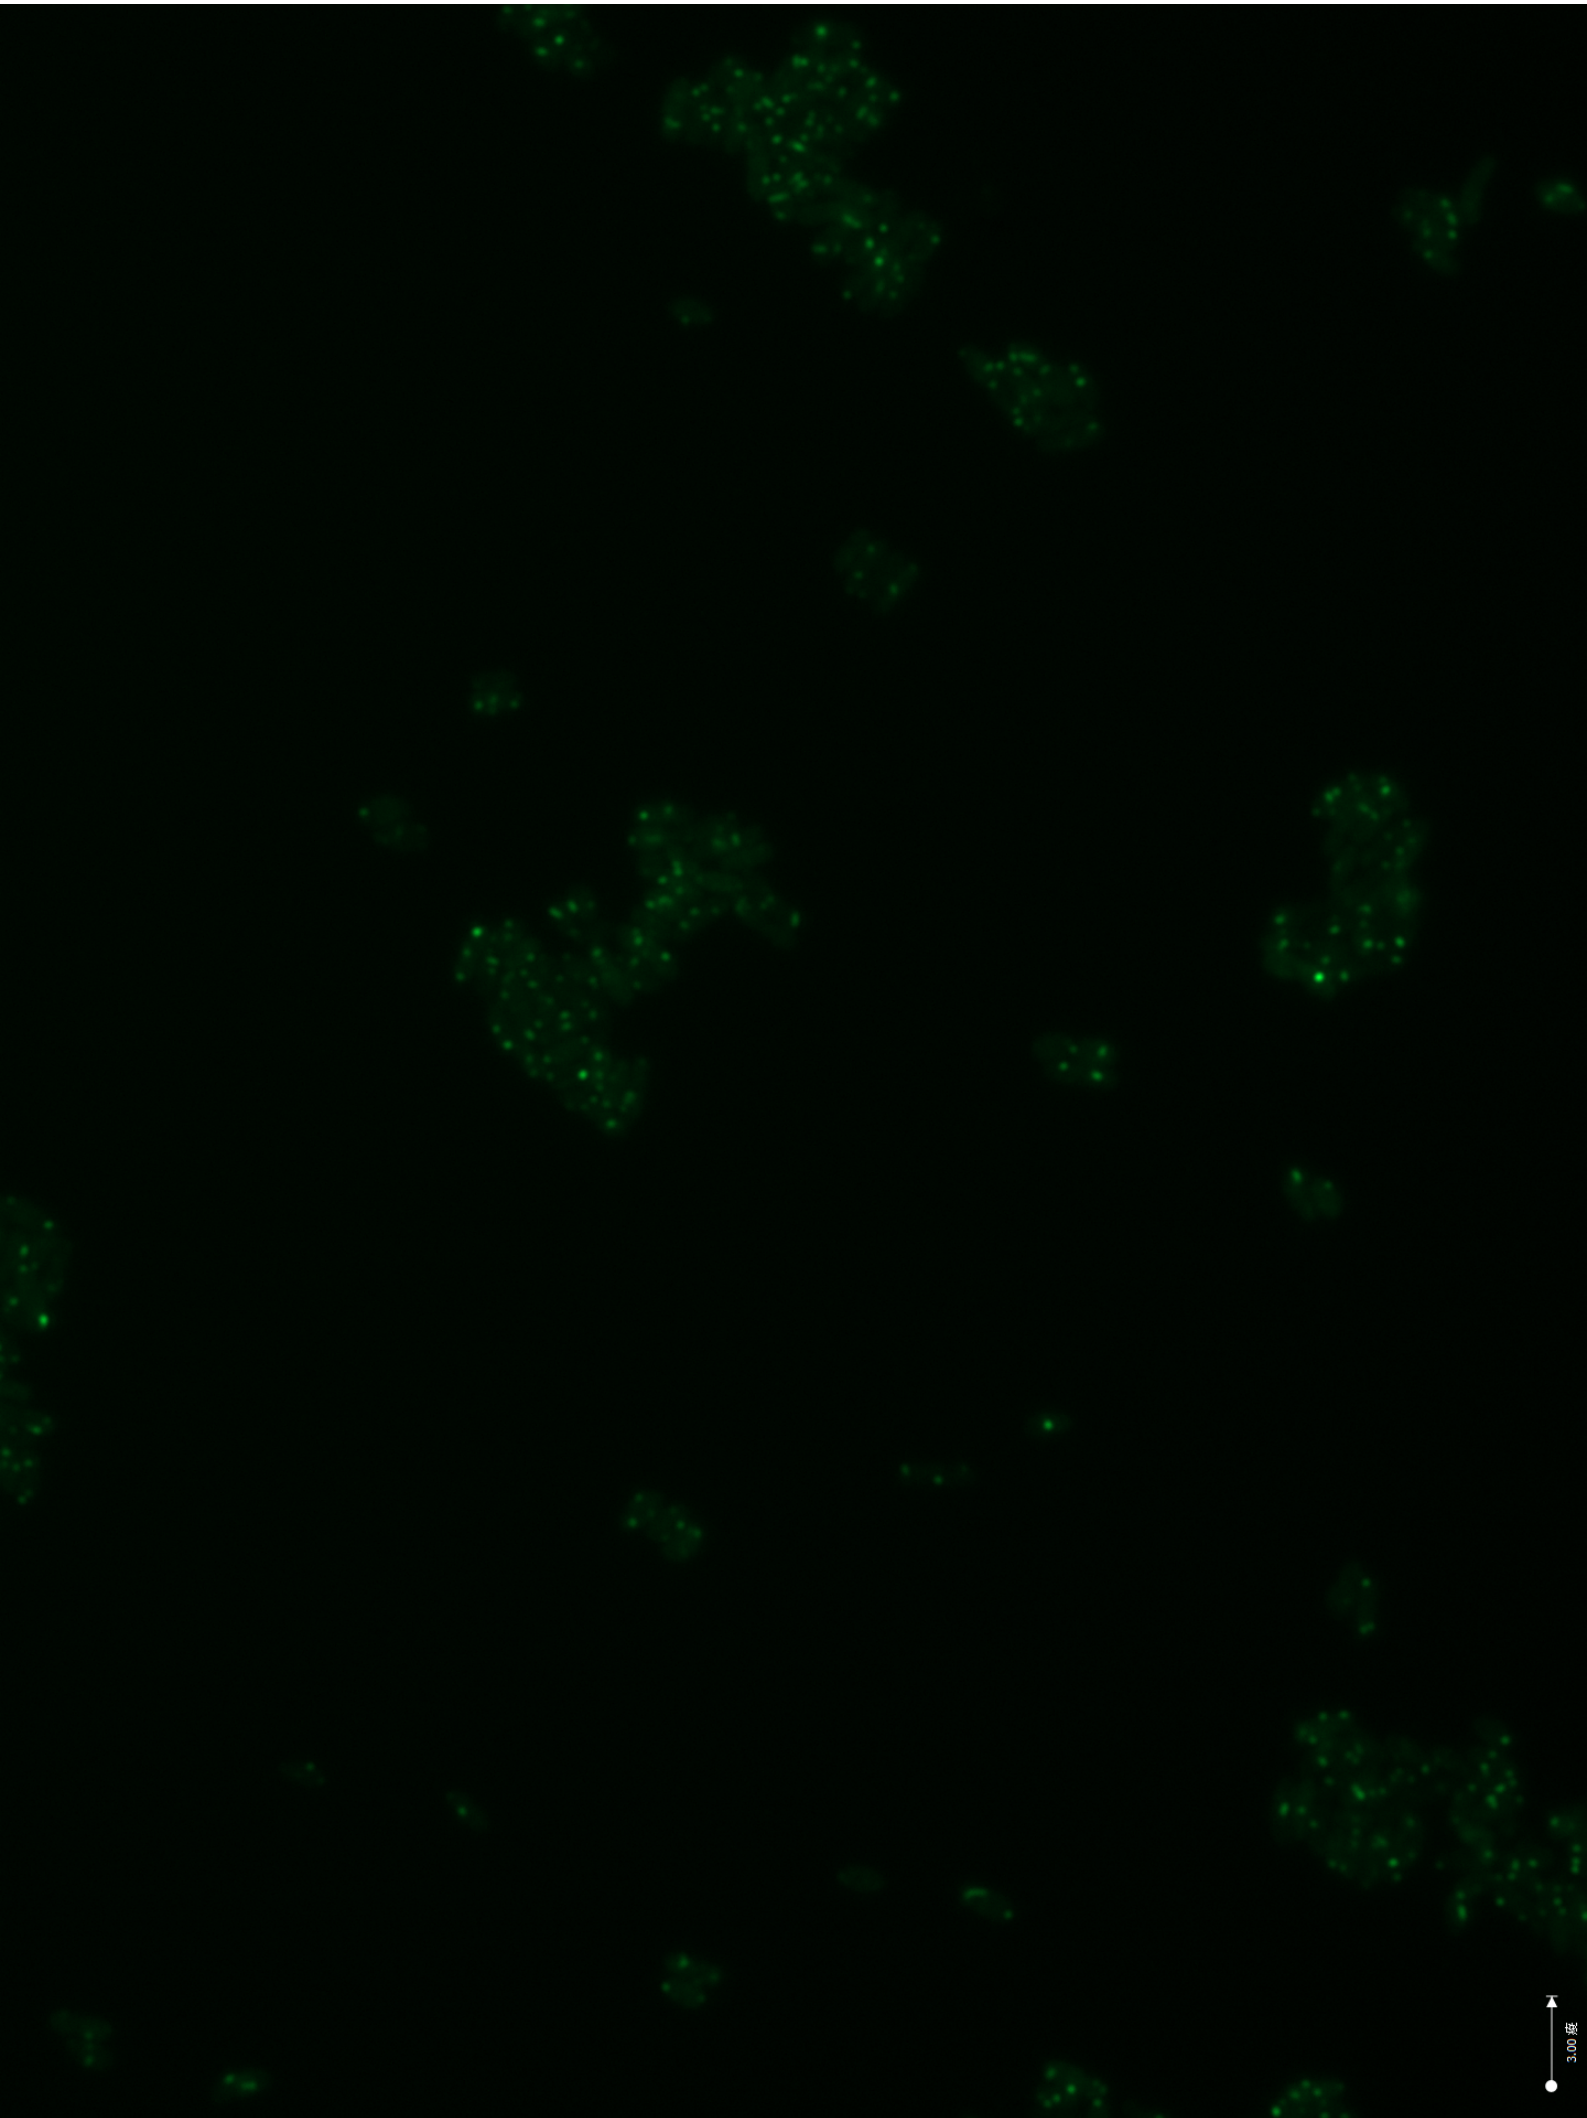

$\Delta tssL\Delta tssB$  (TssB-GFP), phase contrast

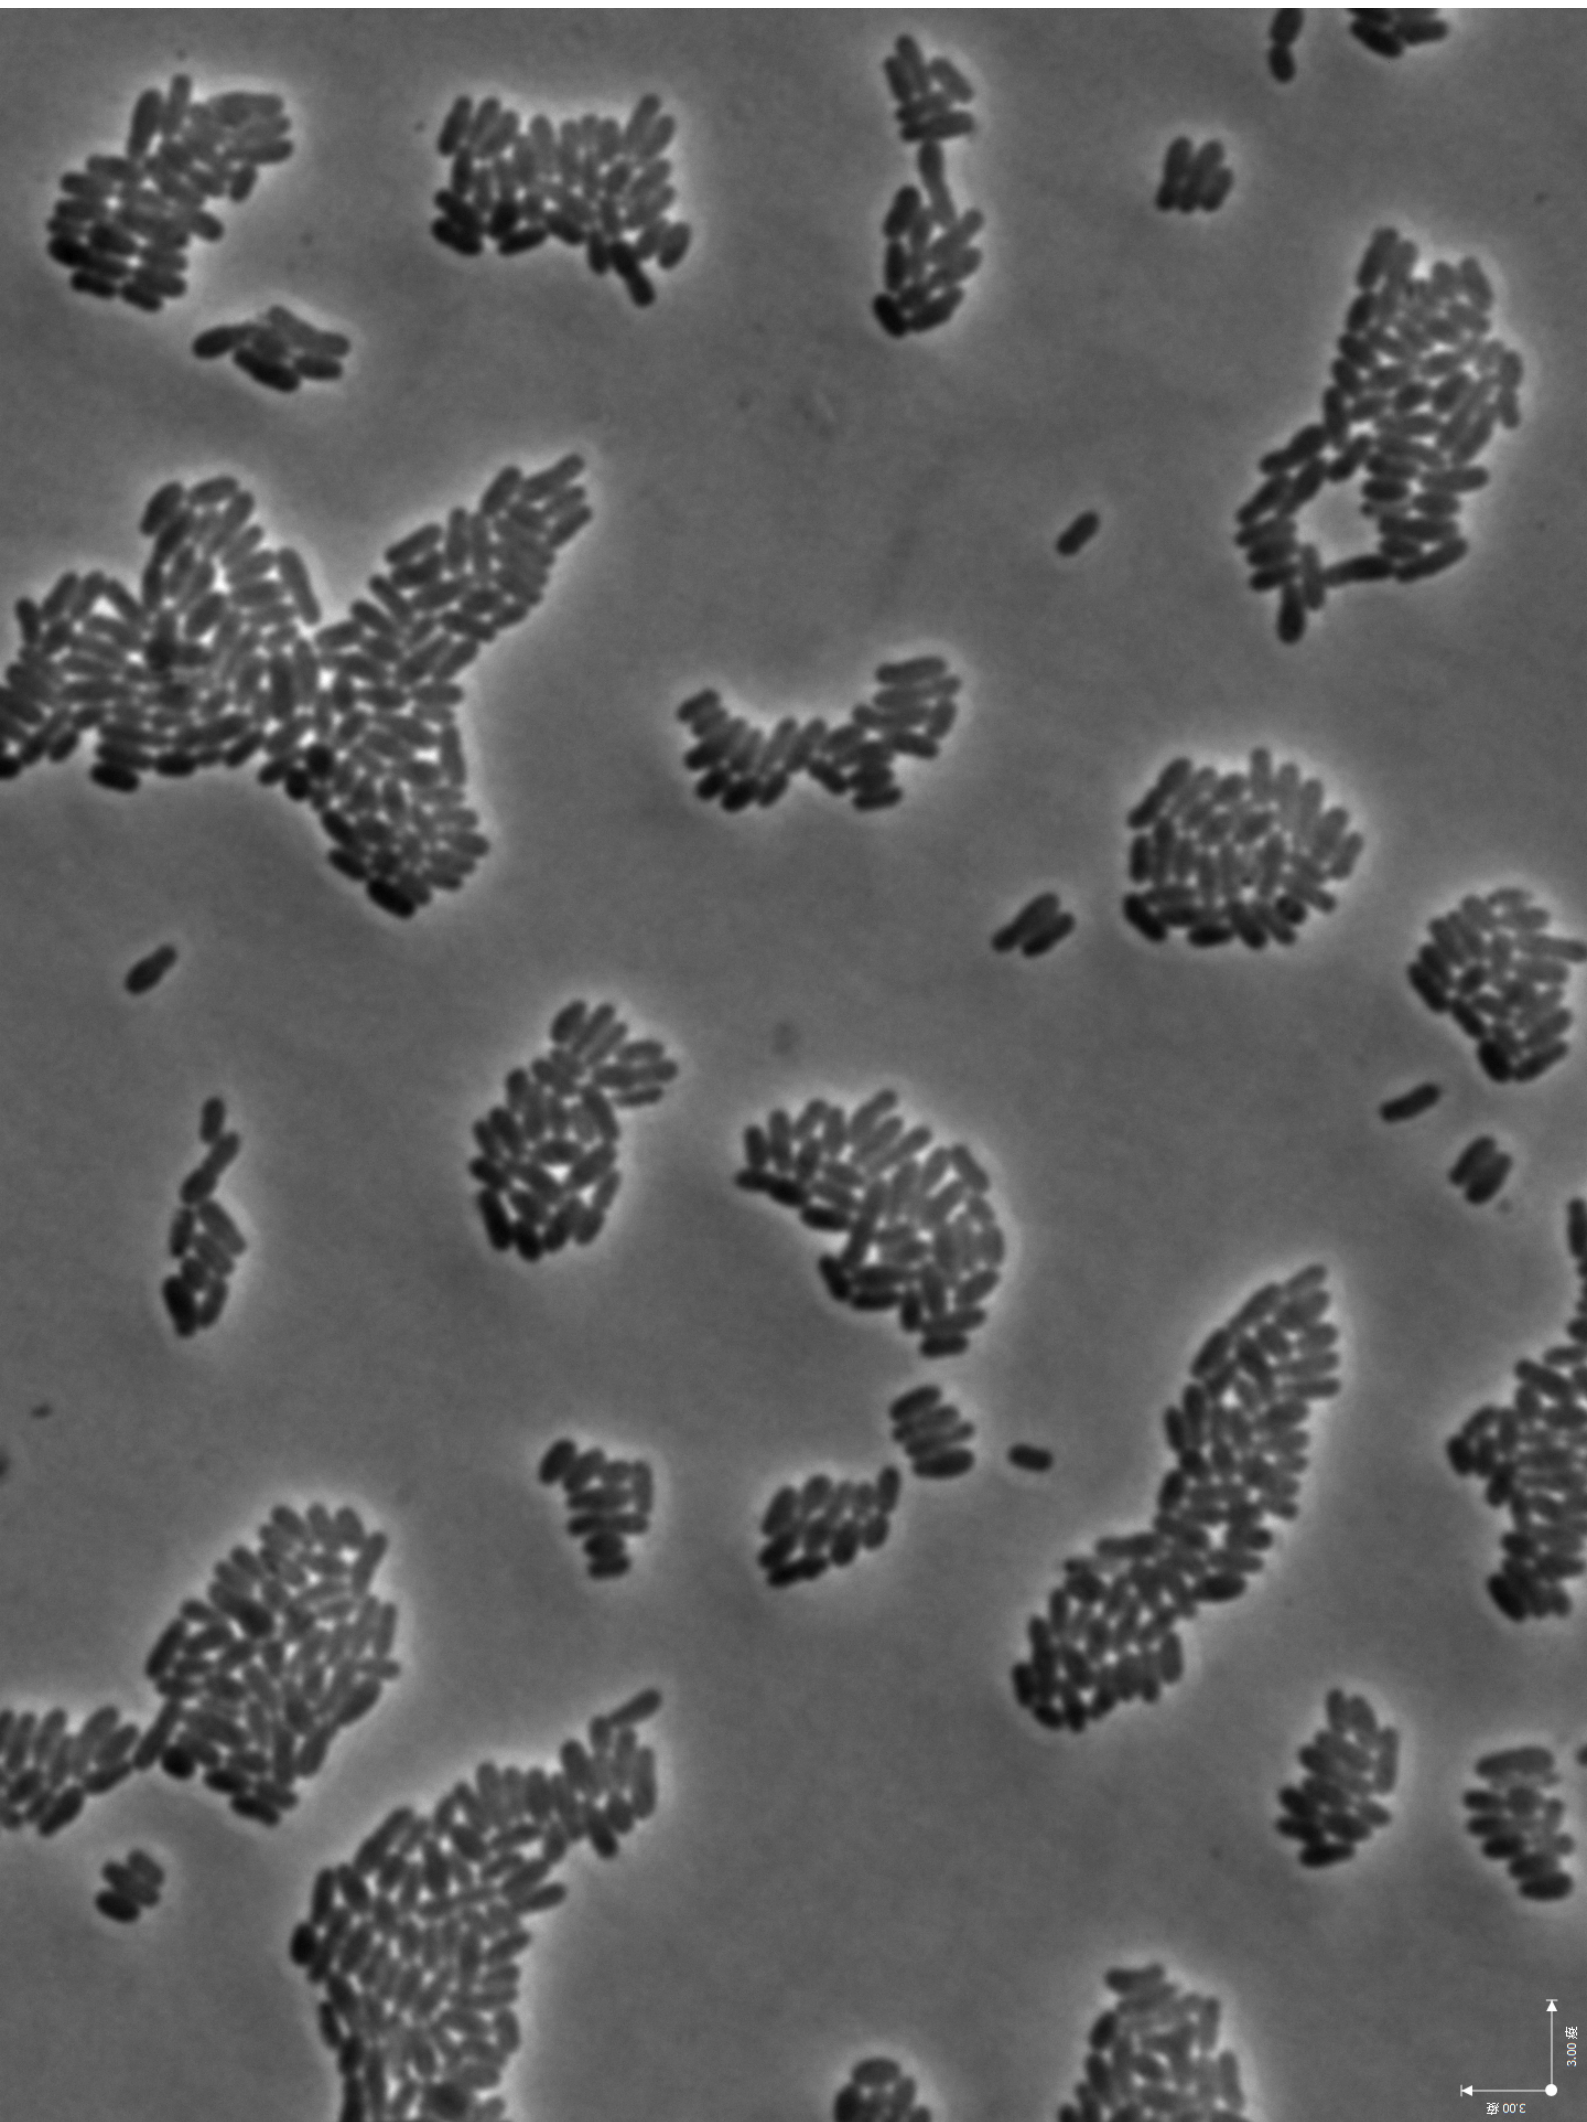

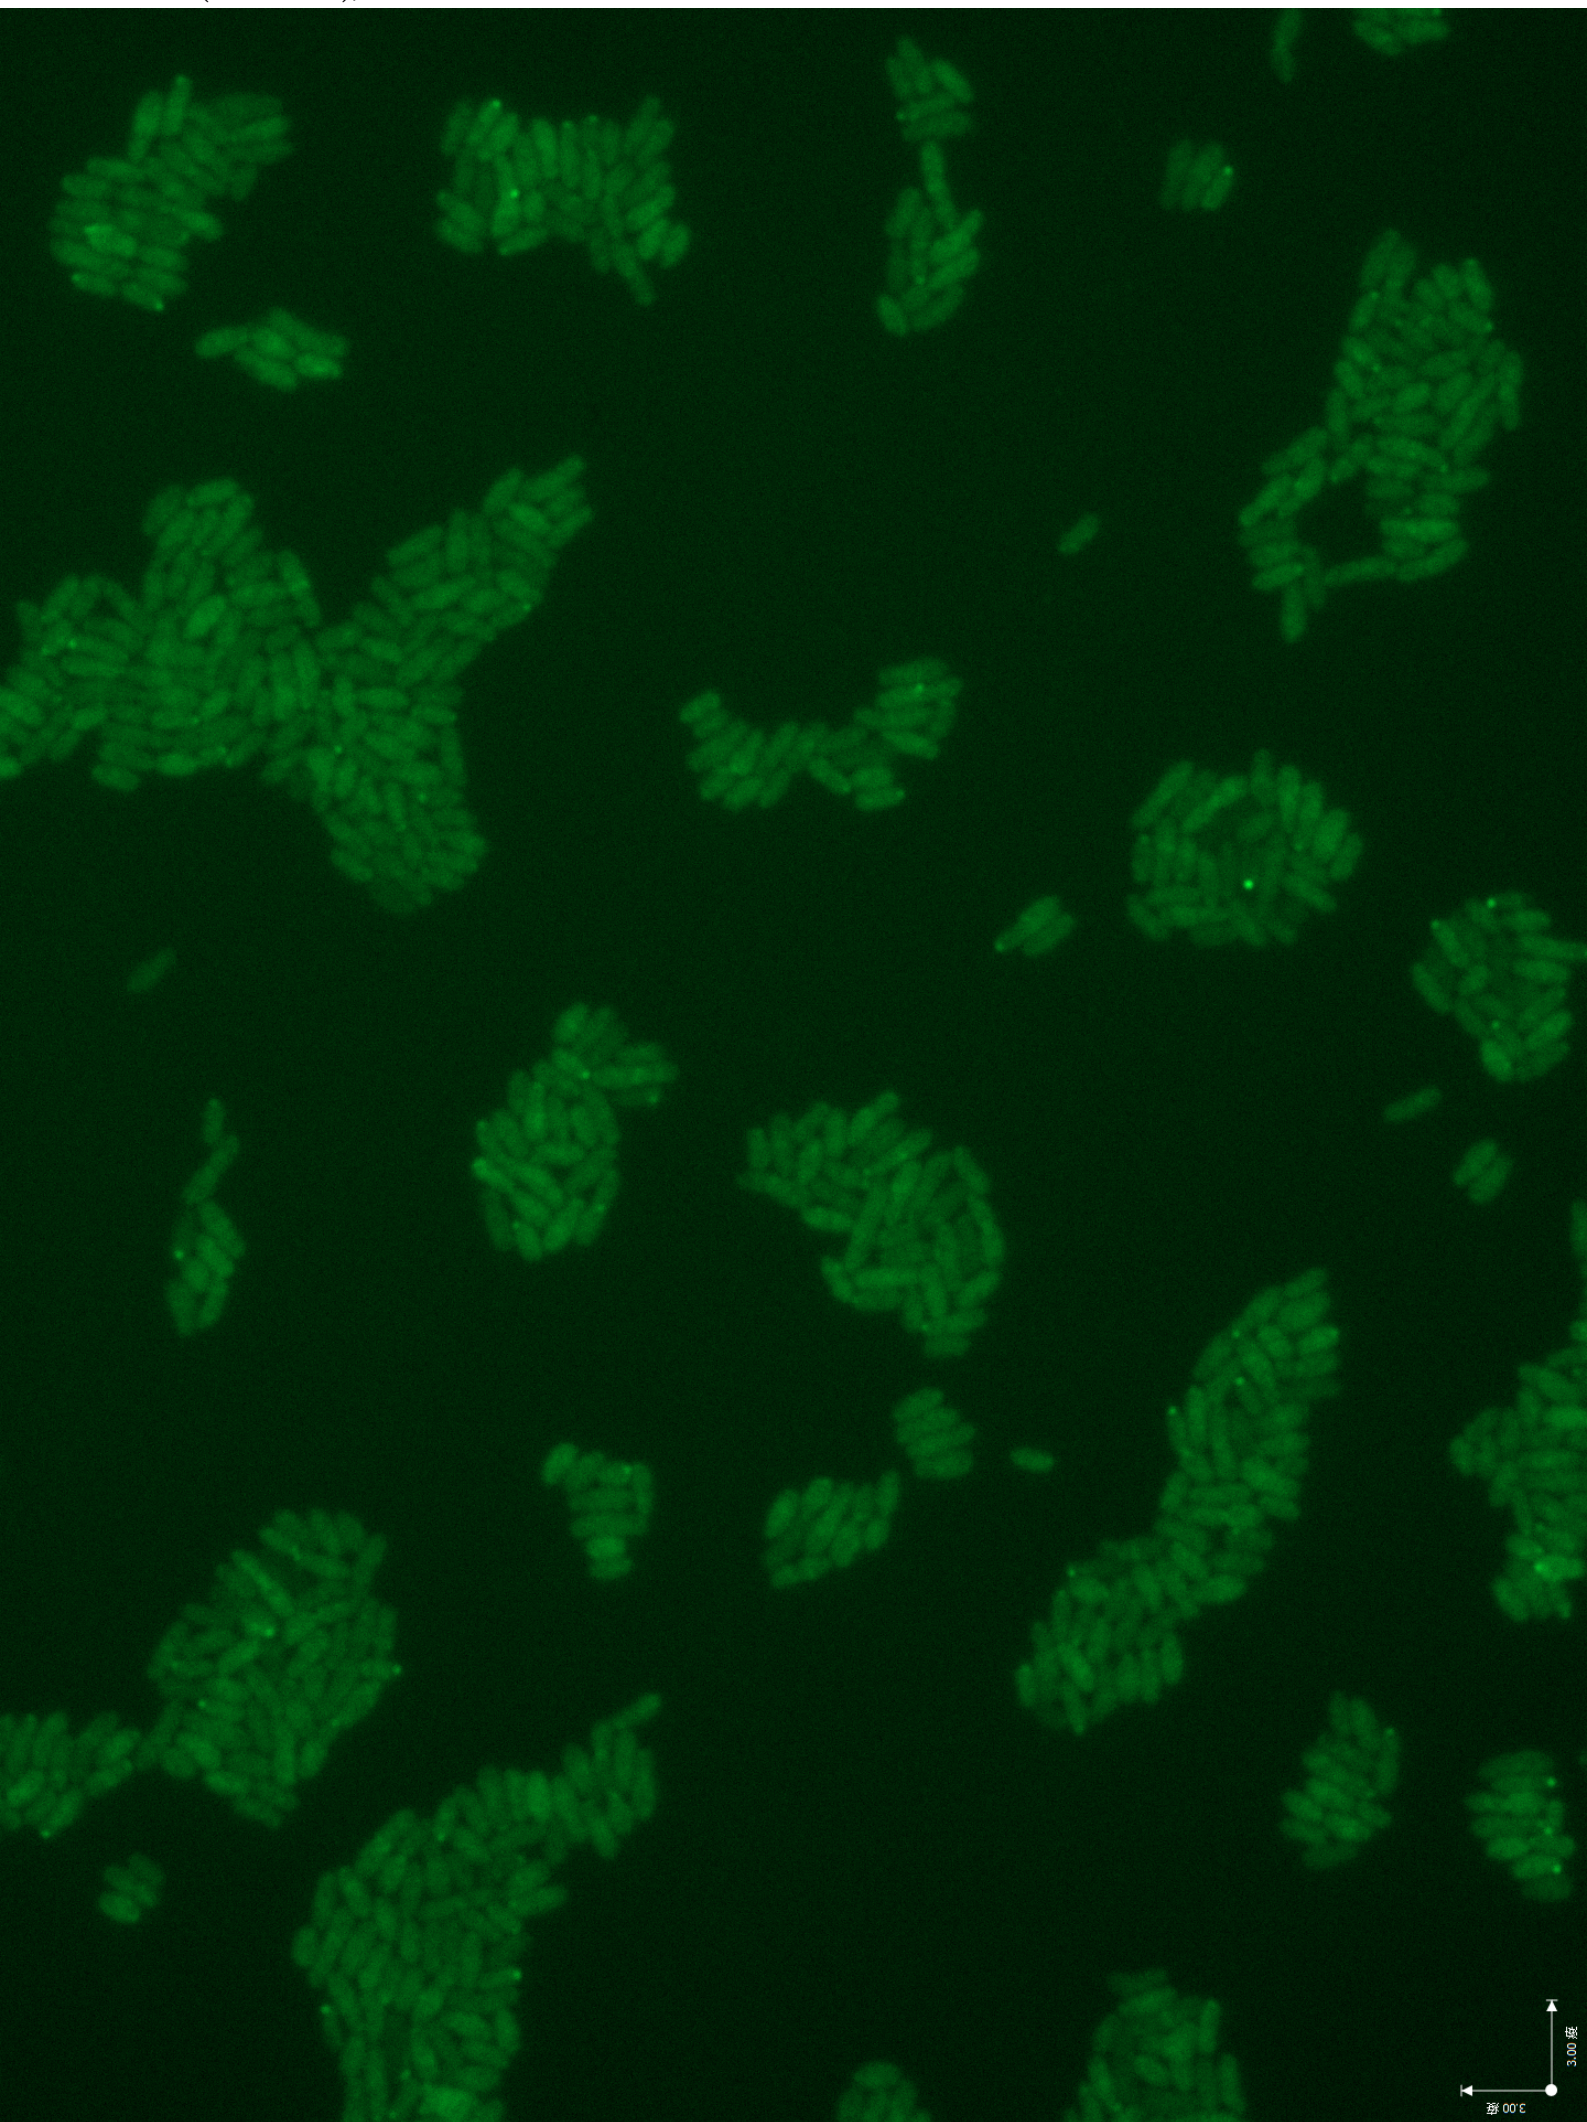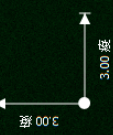

$\Delta tde1\Delta tssB$  (TssB-GFP), phase contrast

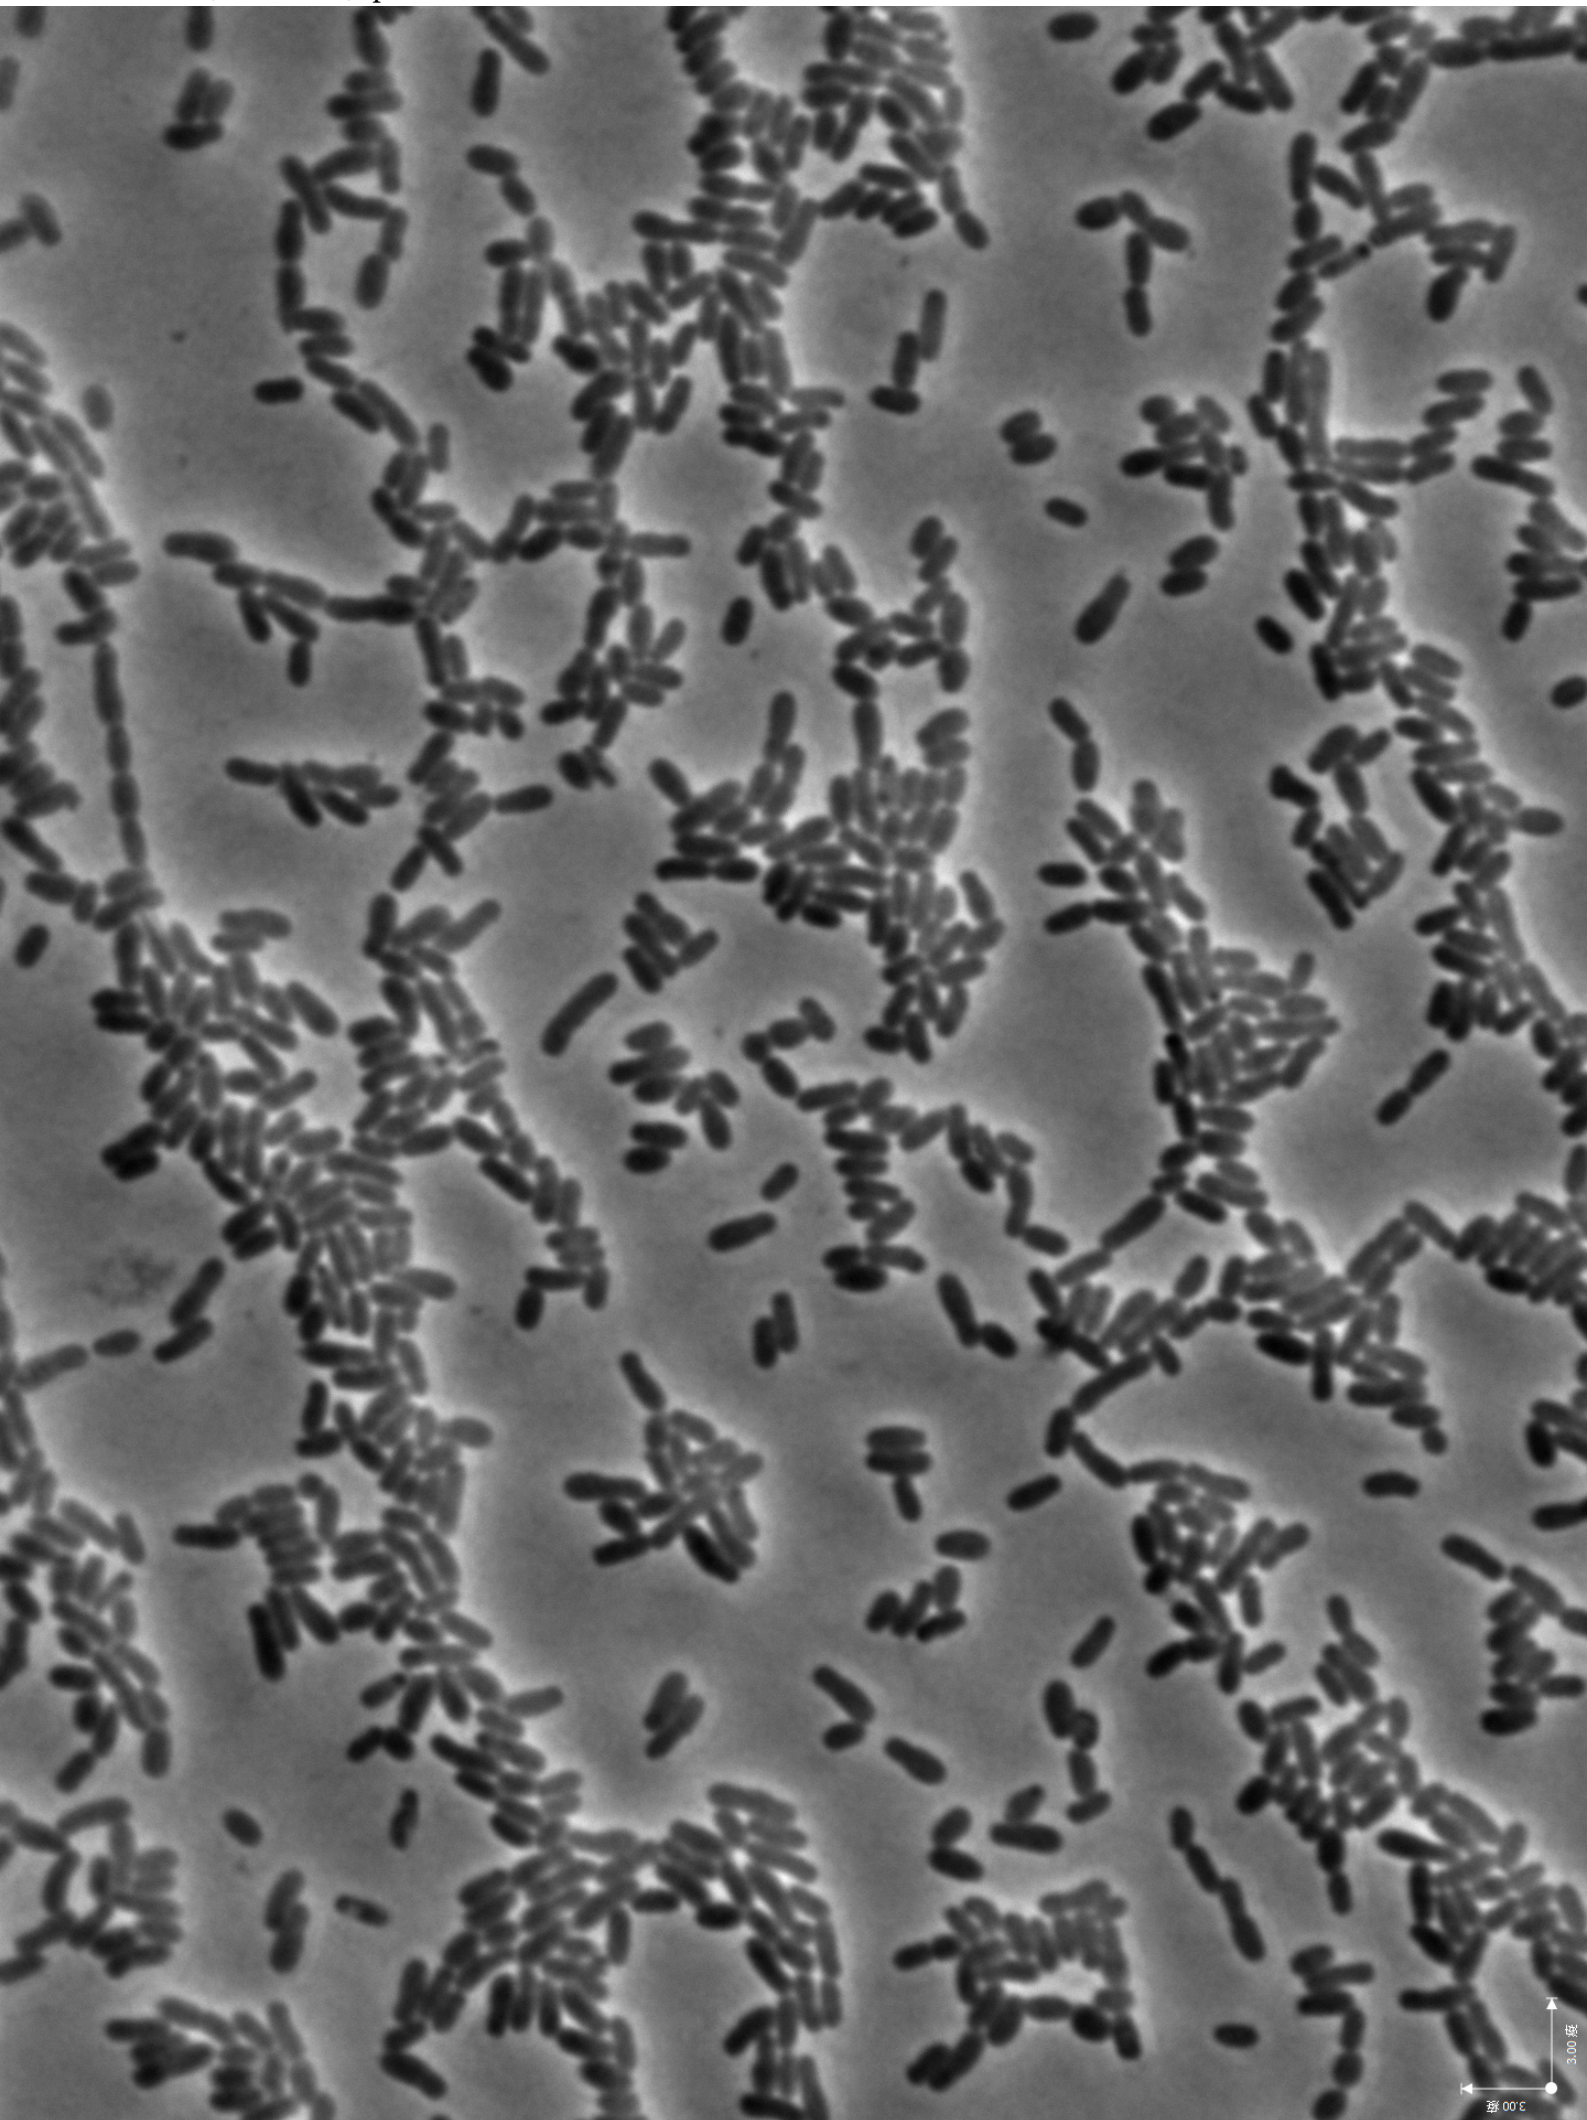

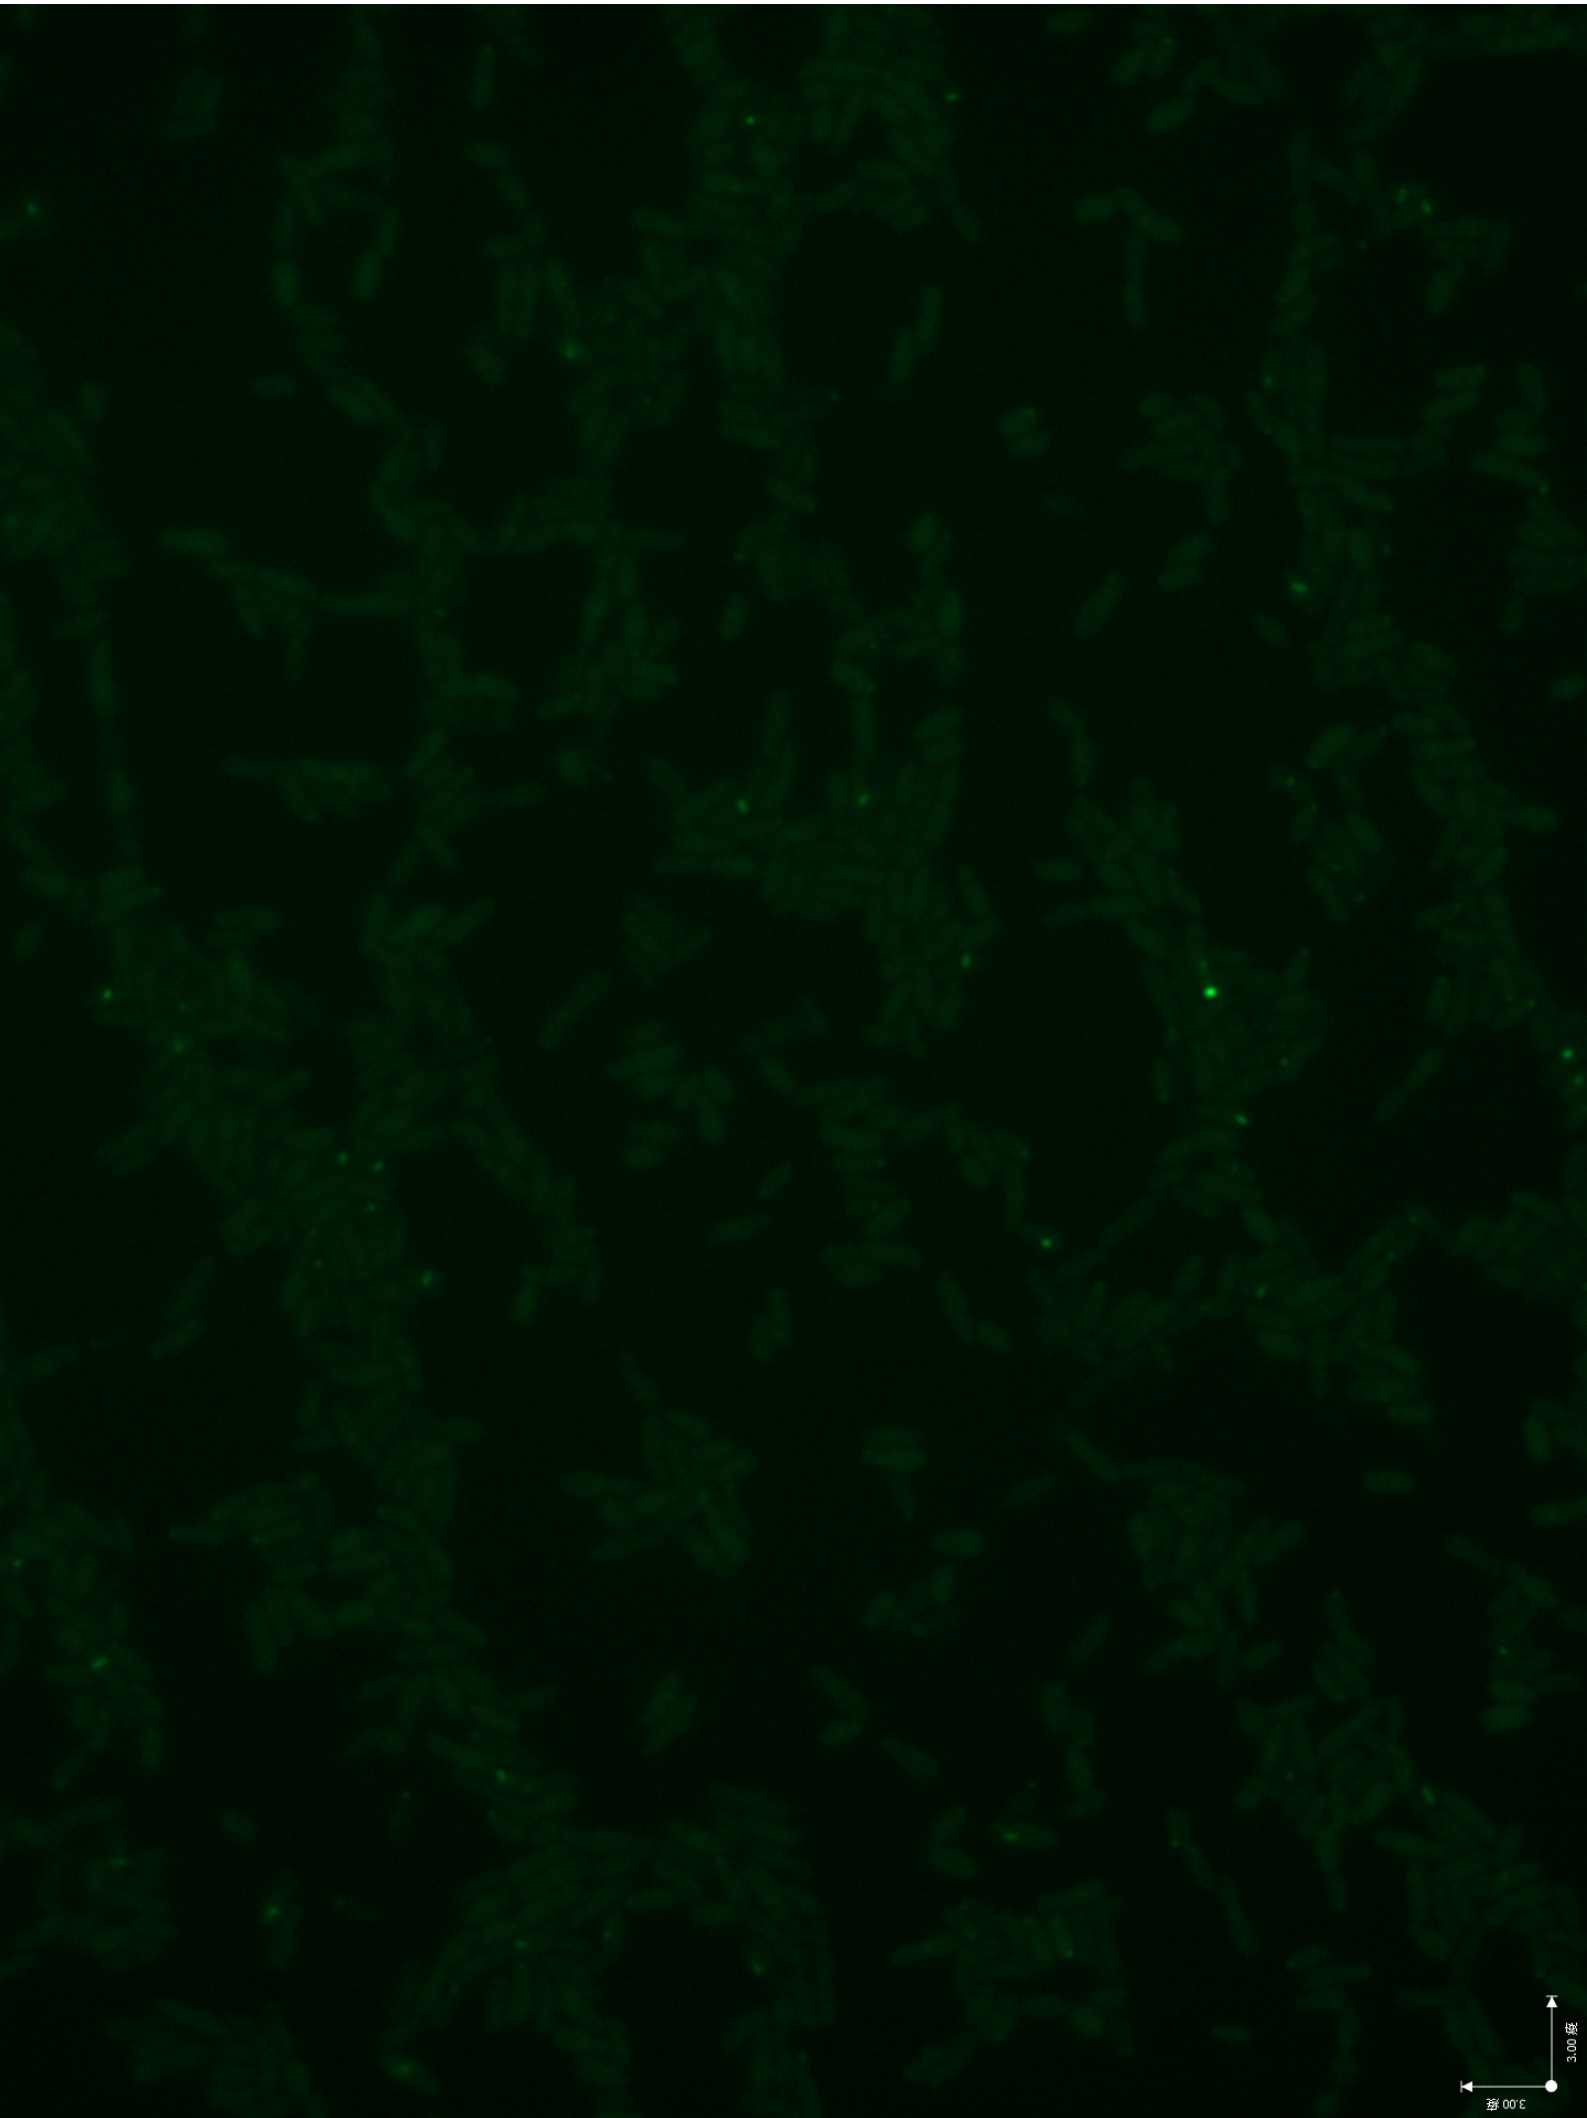

Supplement: EMBR-21-e47961-s005.pdf [file EMBR-21-e47961-s005.pdf]
