# Supplementary material for: Effector loading onto the VgrG carrier activates type VI secretion system assembly
Source: PubMed Central journal article supplement (PMC6945064; doi:10.15252/embr.201947961), 2019-12-05

### Source data for Figure 4B

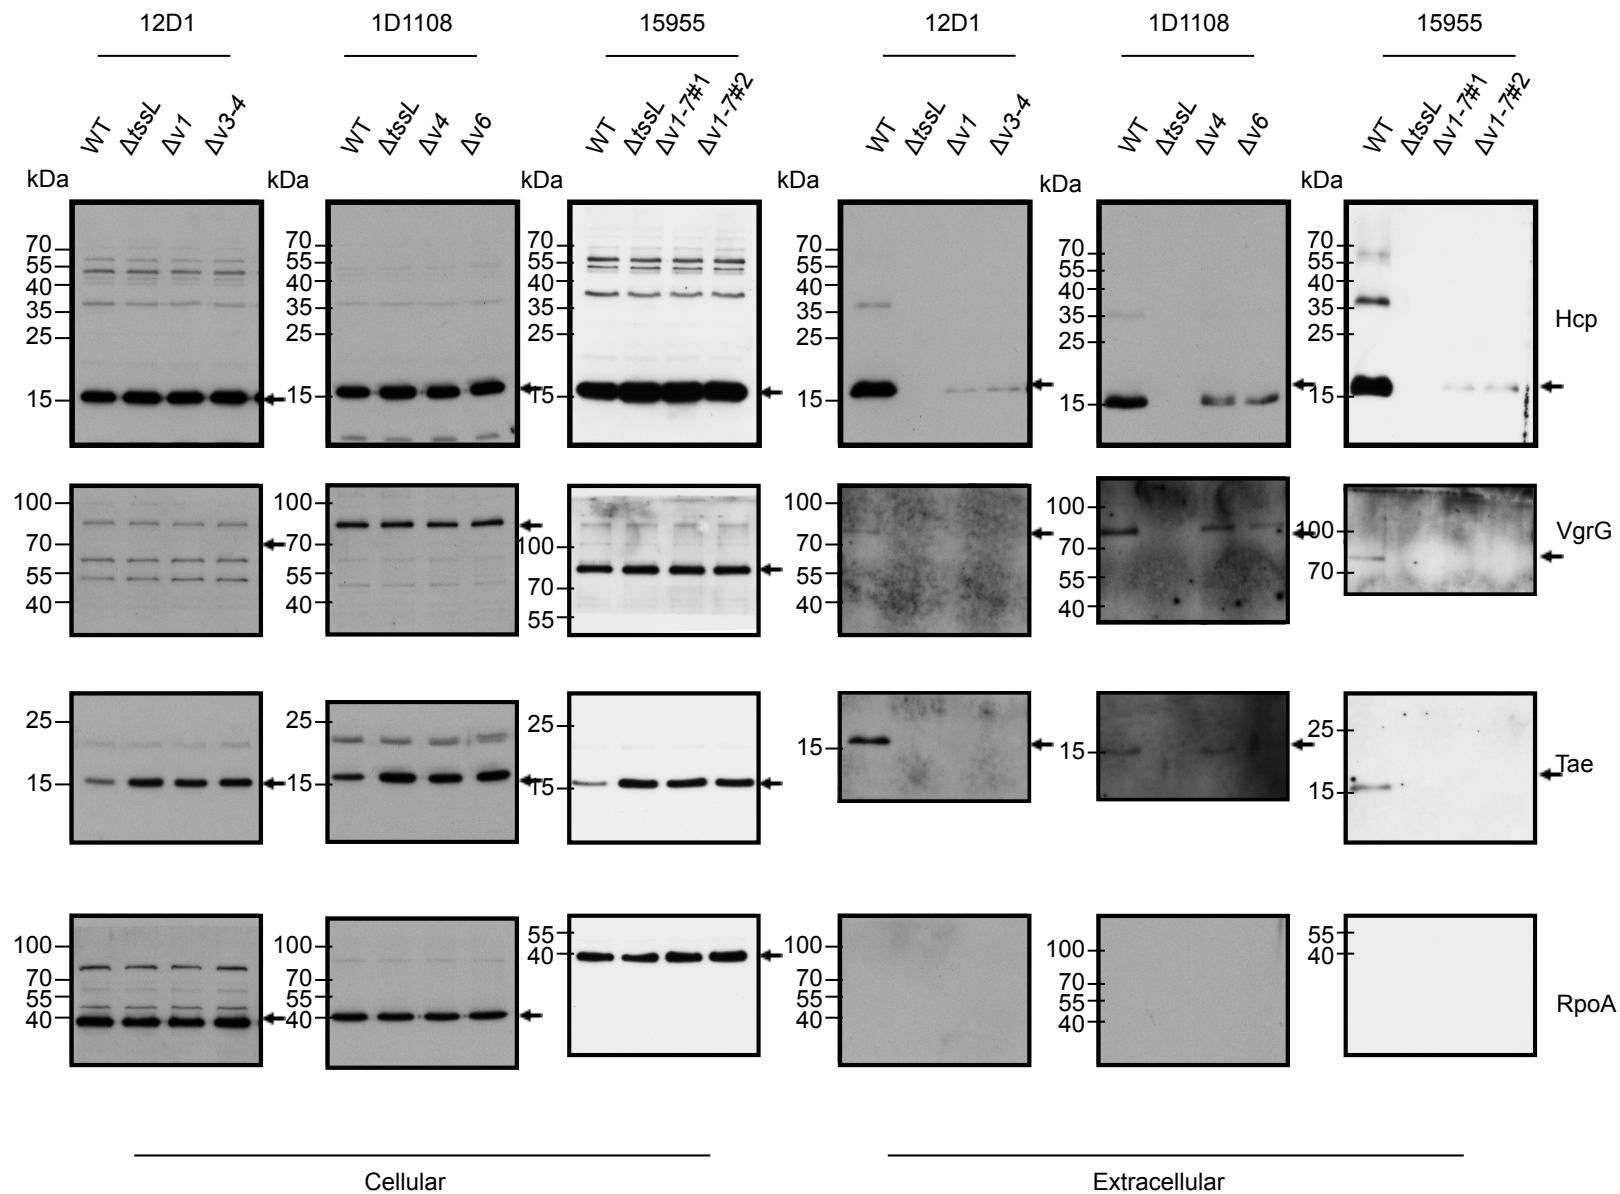



# Source Data for Figure 4E

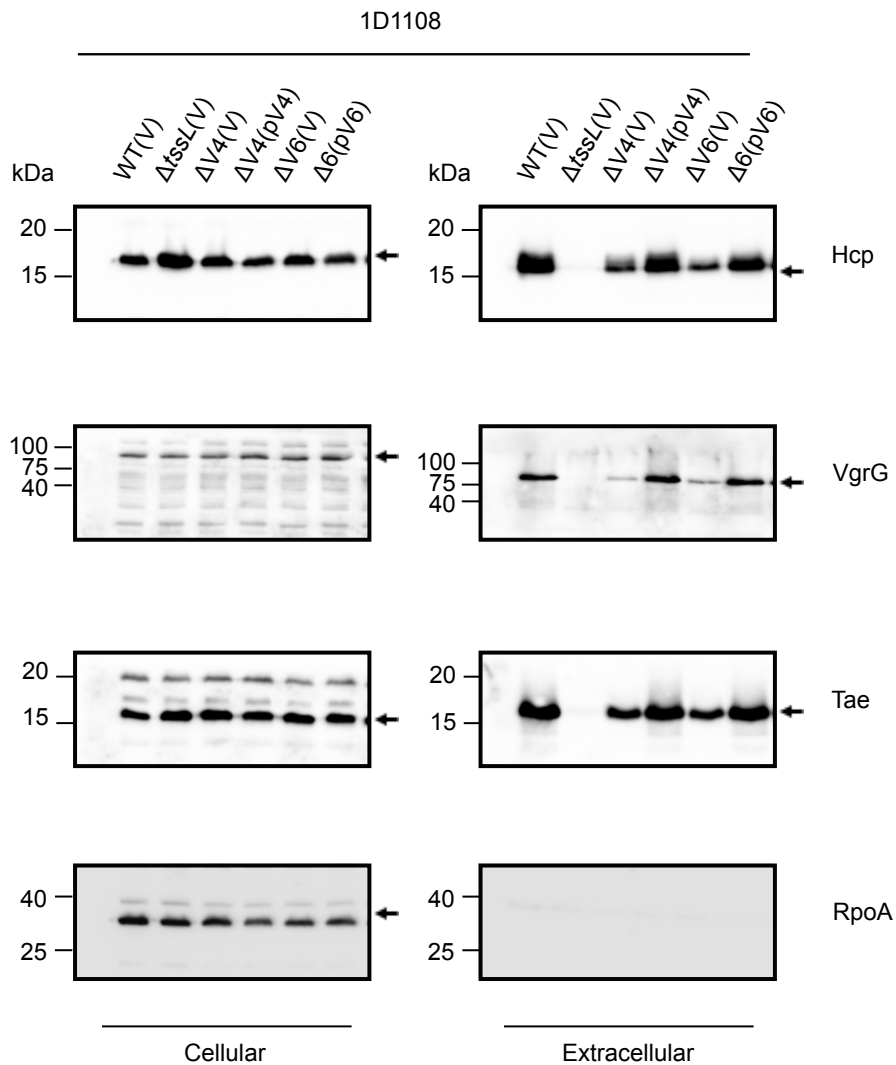

Supplement: EMBR-21-e47961-s006.pdf [file EMBR-21-e47961-s006.pdf]
