# Supplementary material for: Effector loading onto the VgrG carrier activates type VI secretion system assembly
Source: PubMed Central journal article supplement (PMC6945064; doi:10.15252/embr.201947961), 2019-12-05

# Source data for Figure 6A

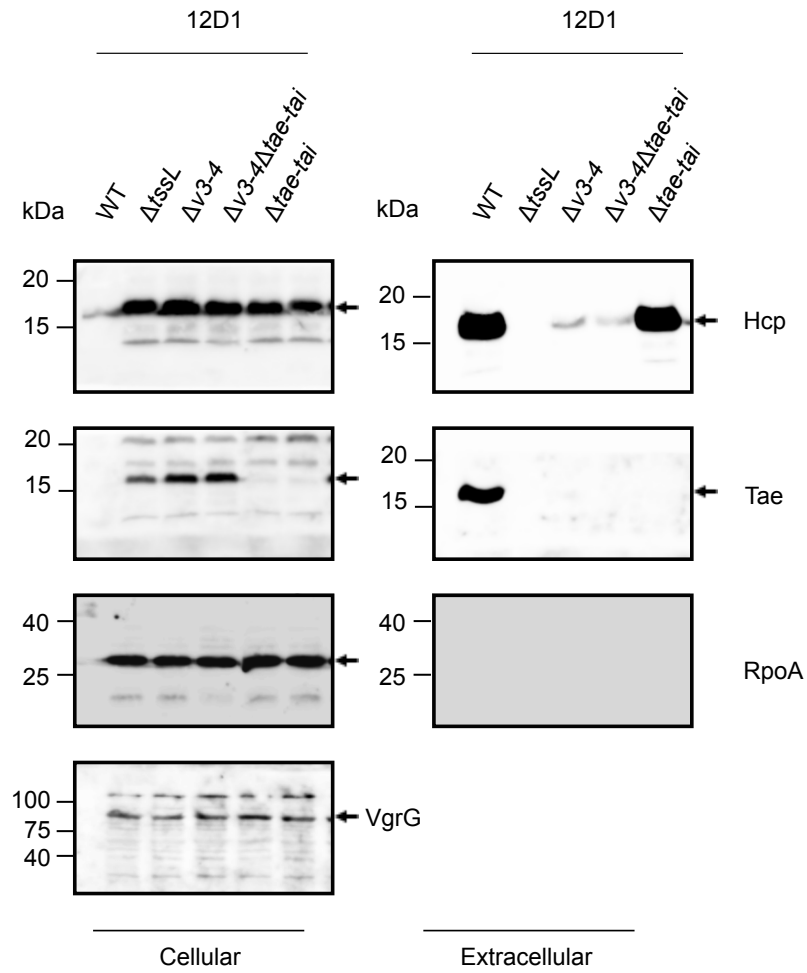

# Source data for Figure 6B

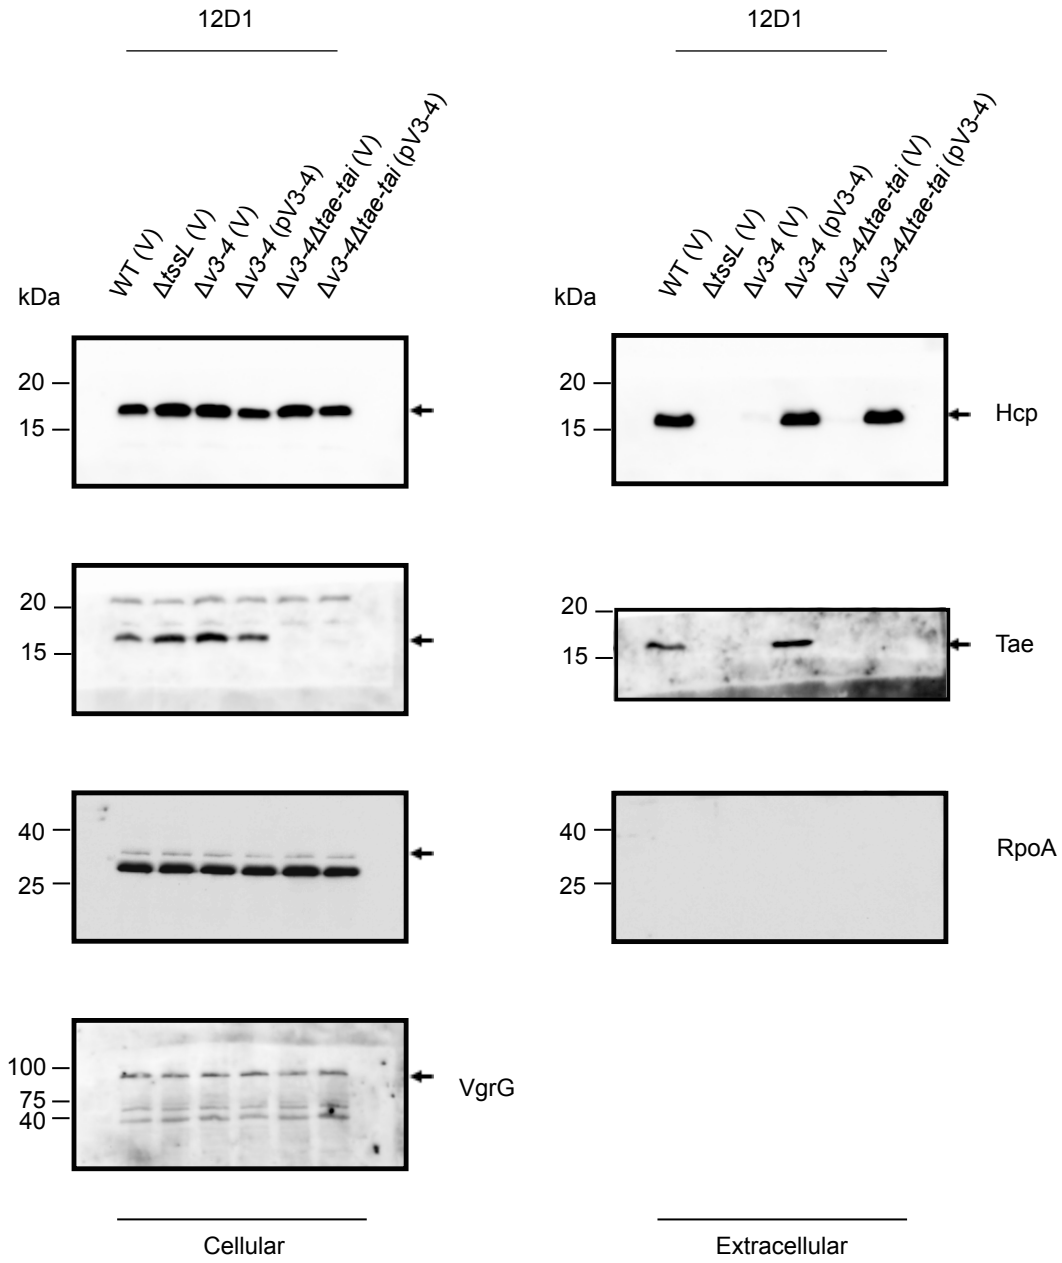

### Source data for Figure 6D

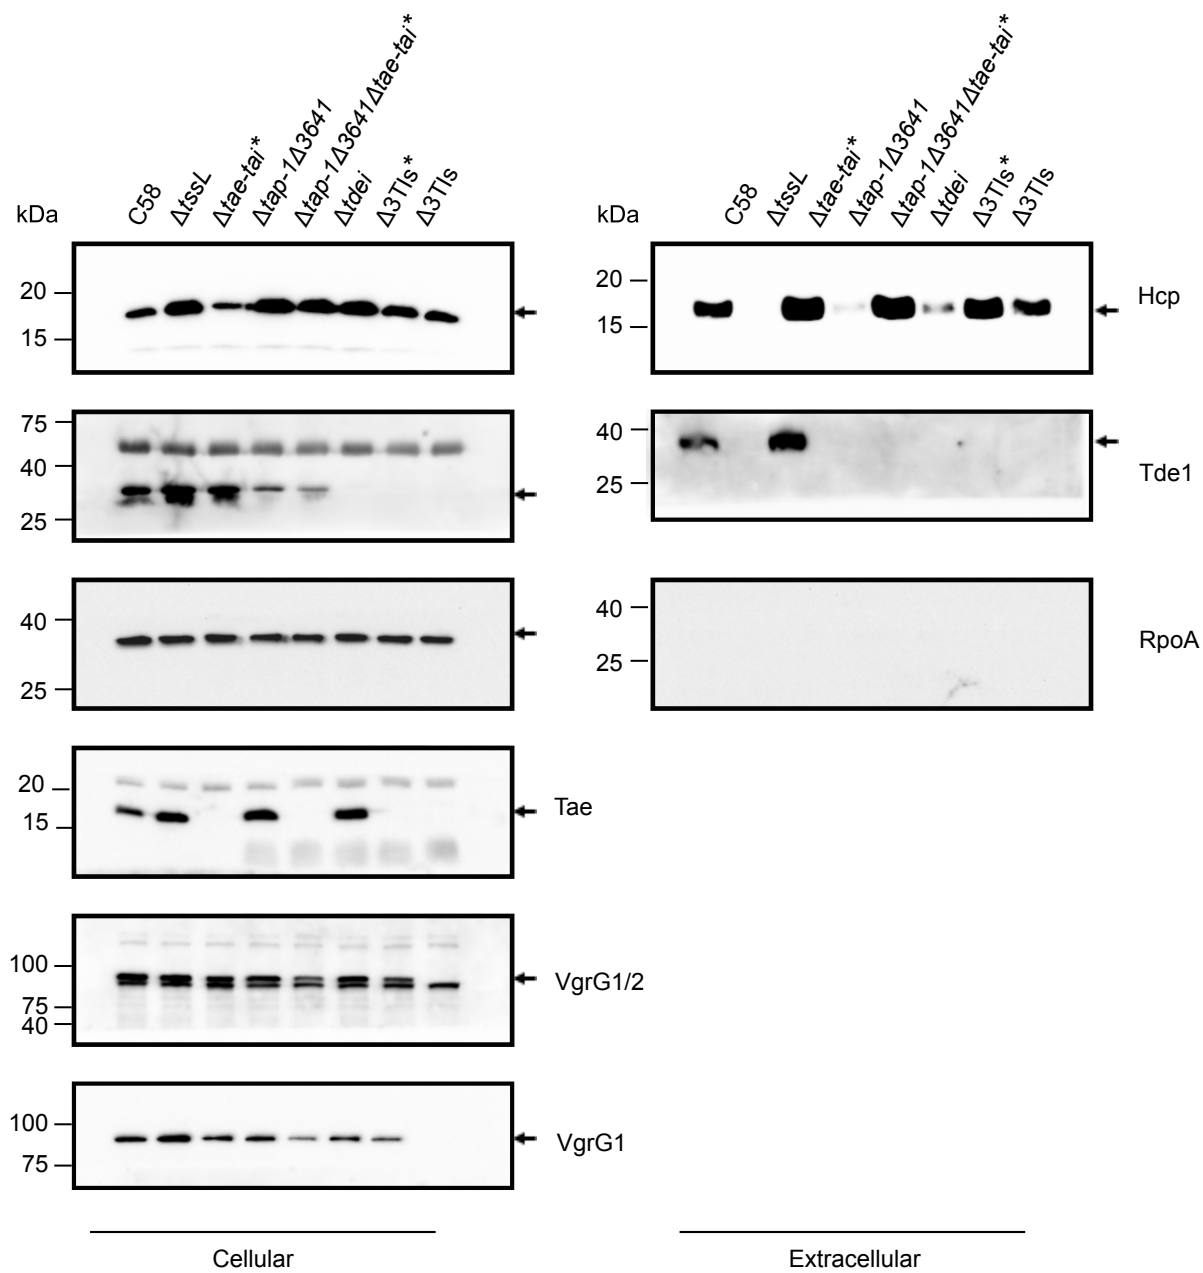

Supplement: EMBR-21-e47961-s008.pdf [file EMBR-21-e47961-s008.pdf]
